# Supplementary material for: Activation of G-Protein-Coupled Estrogen Receptor 1 (GPER1) Reduces Progression of Vulvar Carcinoma Cells
Source: MDPI journal article supplement (doi:10.3390/ijms241813705), 2023-09-05
Supplement: s1 [file s1]

# Supplementary Materials

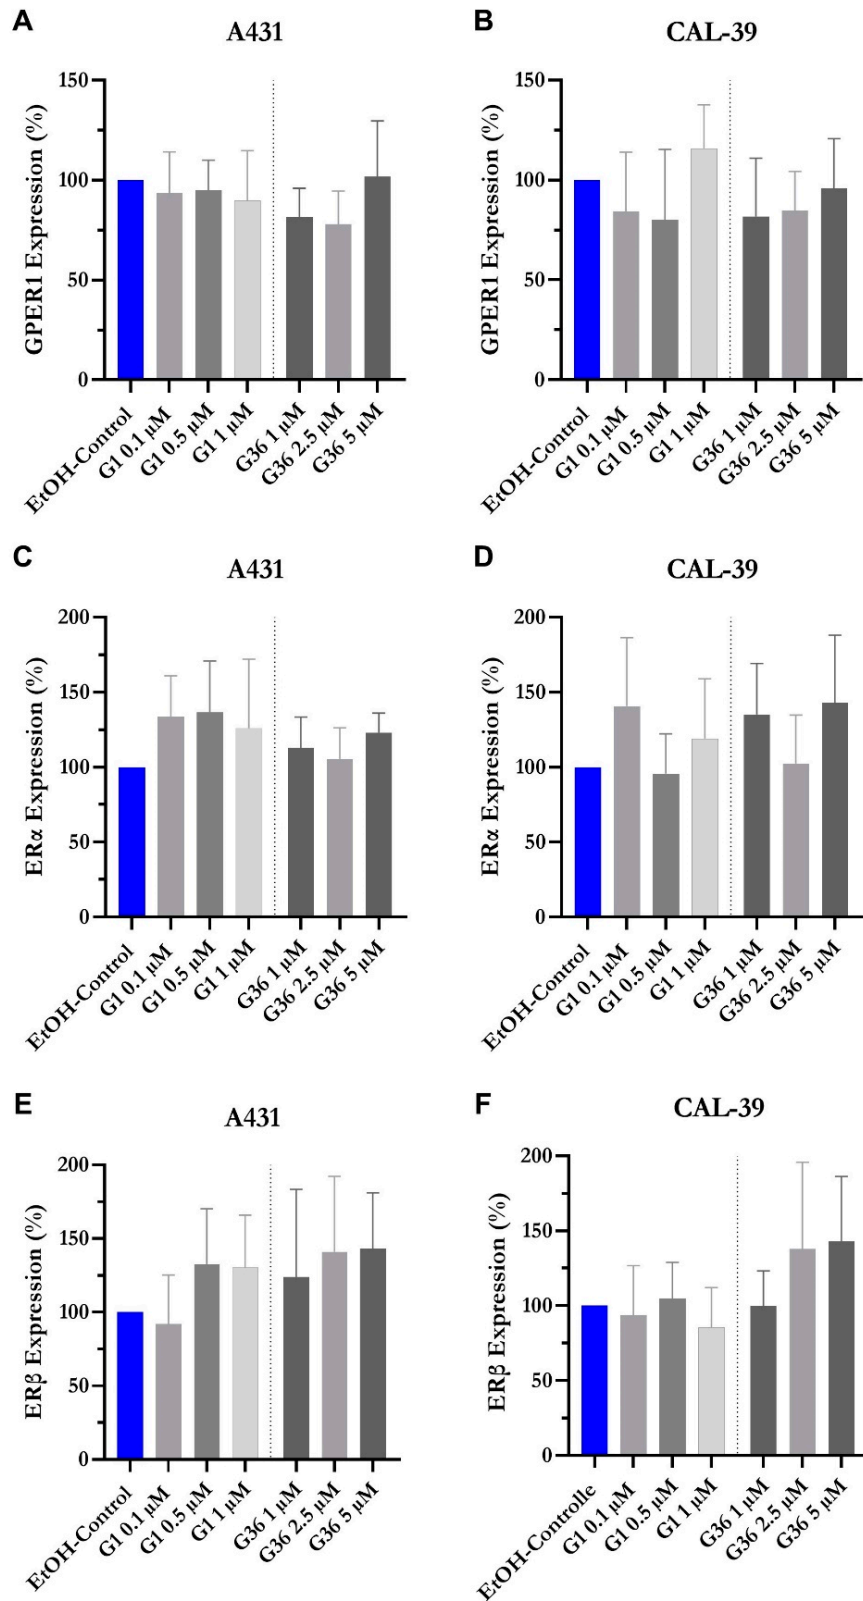

**Figure S1.** Effects of GPER1 agonist G1 and antagonist G36 on estrogen receptor expression in vulvar carcinoma cells. Expression of GPER1 (A,B), ER $\alpha$  (C,D), and ER $\beta$  (E,F) after treatment with G1 or G36 on vulvar carcinoma cells A431 (A,C,E) and CAL-39 (B,D,F).  $n = 3$  (B),  $n = 4$  (A,C-F).

**Table S1.** Densitometric evaluation of the effects of GPER1 agonist G1 and antagonist G36 on expression of GPER1 (A,B), ER $\alpha$  (C,D), and ER $\beta$  (E,F) in A431 (A–E) and CAL-39 (B–F) vulvar carcinoma cells. Mean  $\pm$  SEM % of control (= 100%).

| (A) | Treatment       | Mean (%) | SEM   | <i>n</i> |
|-----|-----------------|----------|-------|----------|
|     | Ethanol control | 100.00   | 0.00  | 4        |
|     | G1 0.1 $\mu$ M  | 93.40    | 20.84 | 4        |
|     | G1 0.5 $\mu$ M  | 95.05    | 15.07 | 4        |
|     | G1 1 $\mu$ M    | 89.73    | 25.12 | 4        |
|     | G36 1 $\mu$ M   | 81.59    | 14.29 | 4        |
|     | G36 2.5 $\mu$ M | 78.12    | 16.47 | 4        |
|     | G36 5 $\mu$ M   | 101.99   | 27.68 | 4        |
| (B) | Treatment       | Mean     | SEM   | <i>n</i> |
|     | Ethanol control | 100.00   | 0.00  | 3        |
|     | G1 0.1 $\mu$ M  | 84.27    | 29.72 | 3        |
|     | G1 0.5 $\mu$ M  | 80.24    | 35.03 | 3        |
|     | G1 1 $\mu$ M    | 115.76   | 21.87 | 3        |
|     | G36 1 $\mu$ M   | 81.76    | 29.17 | 3        |
|     | G36 2.5 $\mu$ M | 84.69    | 19.65 | 3        |
|     | G36 5 $\mu$ M   | 95.96    | 24.69 | 3        |
| (C) | Treatment       | Mean     | SEM   | <i>n</i> |
|     | Ethanol control | 100.00   | 0.00  | 4        |
|     | G1 0.1 $\mu$ M  | 133.64   | 27.28 | 4        |
|     | G1 0.5 $\mu$ M  | 136.70   | 34.18 | 4        |
|     | G1 1 $\mu$ M    | 126.08   | 46.03 | 4        |
|     | G36 1 $\mu$ M   | 112.98   | 20.42 | 4        |
|     | G36 2.5 $\mu$ M | 105.37   | 21.02 | 4        |
|     | G36 5 $\mu$ M   | 123.06   | 13.05 | 4        |
| (D) | Treatment       | Mean     | SEM   | <i>n</i> |
|     | Ethanol control | 100.00   | 0.00  | 4        |
|     | G1 0.1 $\mu$ M  | 140.81   | 45.68 | 4        |
|     | G1 0.5 $\mu$ M  | 95.72    | 26.48 | 4        |
|     | G1 1 $\mu$ M    | 119.13   | 39.77 | 4        |
|     | G36 1 $\mu$ M   | 135.00   | 34.24 | 4        |
|     | G36 2.5 $\mu$ M | 102.47   | 32.32 | 4        |
|     | G36 5 $\mu$ M   | 142.84   | 45.29 | 4        |
| (E) | Treatment       | Mean     | SEM   | <i>n</i> |
|     | Ethanol control | 100.00   | 0.00  | 4        |
|     | G1 0.1 $\mu$ M  | 92.03    | 33.18 | 4        |
|     | G1 0.5 $\mu$ M  | 132.60   | 37.71 | 4        |
|     | G1 1 $\mu$ M    | 130.47   | 35.42 | 4        |
|     | G36 1 $\mu$ M   | 123.89   | 59.57 | 4        |
|     | G36 2.5 $\mu$ M | 141.02   | 51.20 | 4        |
|     | G36 5 $\mu$ M   | 143.29   | 37.72 | 4        |
| (F) | Treatment       | Mean     | SEM   | <i>n</i> |
|     | Ethanol control | 100.00   | 0.00  | 4        |
|     | G1 0.1 $\mu$ M  | 93.75    | 33.04 | 4        |
|     | G1 0.5 $\mu$ M  | 104.93   | 23.91 | 4        |
|     | G1 1 $\mu$ M    | 85.57    | 26.59 | 4        |
|     | G36 1 $\mu$ M   | 99.69    | 23.64 | 4        |
|     | G36 2.5 $\mu$ M | 137.88   | 57.89 | 4        |
|     | G36 5 $\mu$ M   | 142.85   | 43.33 | 4        |
